# Supplementary material
Source: publisher site journal article supplement (https://static.cambridge.org/content/id/urn:cambridge.org:id:article:S026646662000002X/resource/name/S026646662000002Xsupp001.pdf)
Supplement: Supplementary file 1 [file S026646662000002Xsupp001.pdf]

# Supplemental Online Appendix for “Instrumental Variable Quantile Regression with Misclassification” by Takuya Ura

## Additional simulation results

This supplemental online appendix provides additional simulation results in the simulation designs in Section 6.2. The proposed inference method uses the Bonferroni size correction for the parameters  $(\pi_0, \pi_1)$ . To evaluate the conservatism of the Bonferroni correction, the proposed inference method is compared with the infeasible method with knowing  $(p_0, p_1) = (\pi_0, \pi_1)$ . The infeasible inference method is based on the true parameter  $(\pi_0, \pi_1)$ , and uses  $T(\alpha; \pi_0, \pi_1)$  and  $cv$  in Section 5 with  $size_2 = 5\%$ .

For all the simulation designs, the proposed method rejects the alternatives less often than the infeasible method. The power comparisons are different between the alternatives larger and smaller than  $\alpha_0$ . On one hand, the power of the proposed method for the alternative smaller than  $\alpha_0$  is comparable to that of the infeasible method. On the other hand, the powers are significantly different for the alternative larger  $\alpha_0$ . I conjecture that the value of  $(p_0, p_1)$  might not be relevant to reject the alternative smaller than  $\alpha_0$ , because, as in Section 3, it is possible to get a lower bound for  $\alpha_0$  without using the variable  $D$ .

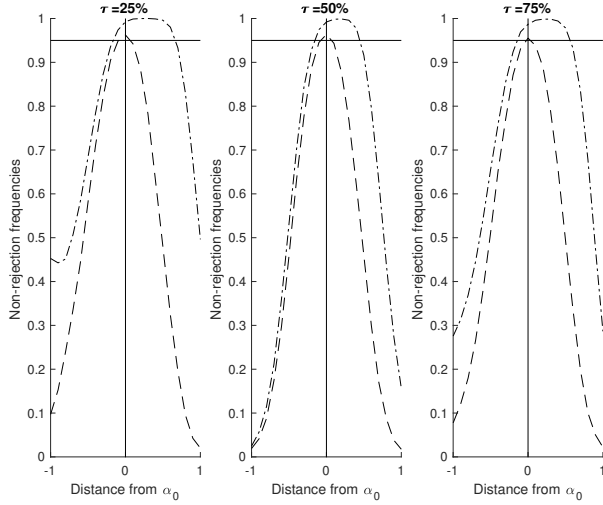

Figure 3.a:  $\pi_0 = \pi_1 = 0$ .

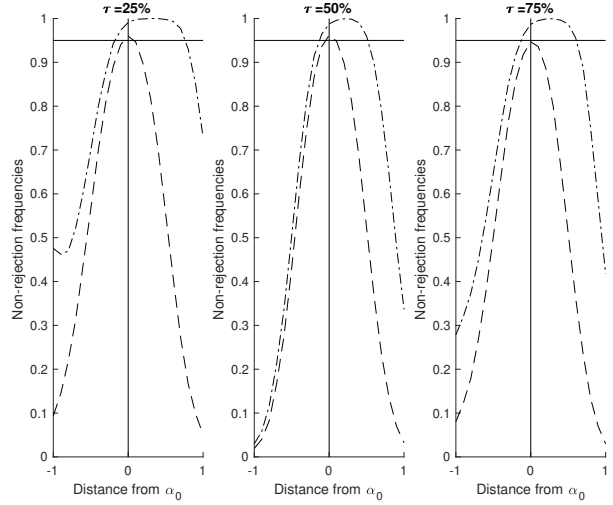

Figure 3.b:  $\pi_0 = 0.1$  and  $\pi_1 = 0$ .

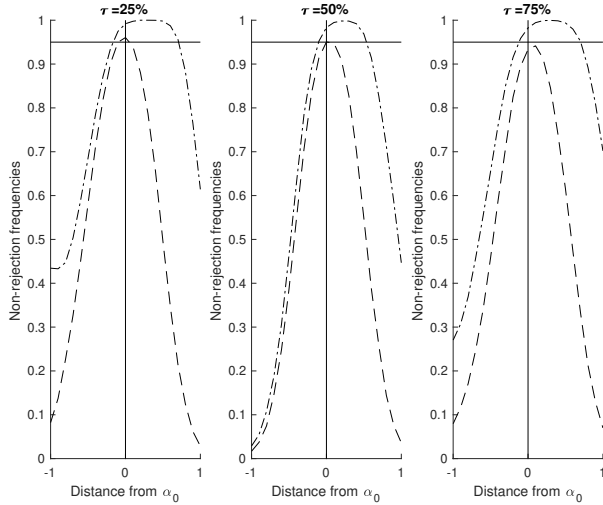

Figure 3.c:  $\pi_0 = 0$  and  $\pi_1 = 0.1$ .

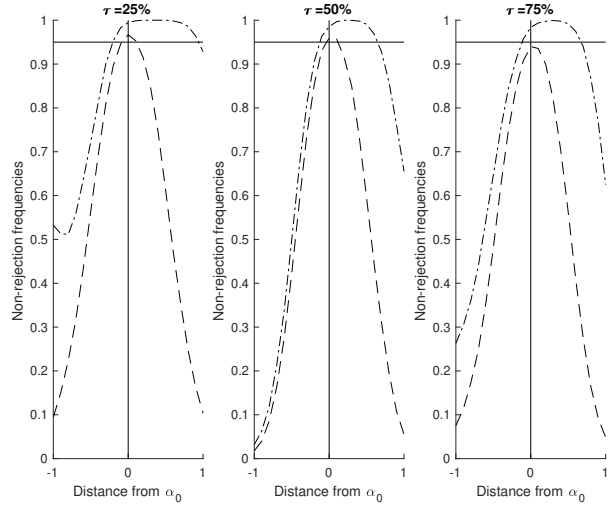

Figure 3.d:  $\pi_0 = 0.2$  and  $\pi_1 = 0$ .

Figure 3: Coverage frequencies. The dash-dot (—.) curve represents the proposed inference method, and the dashed (--) curve represents the infeasible inference method with knowing  $(p_0, p_1) = (\pi_0, \pi_1)$ .

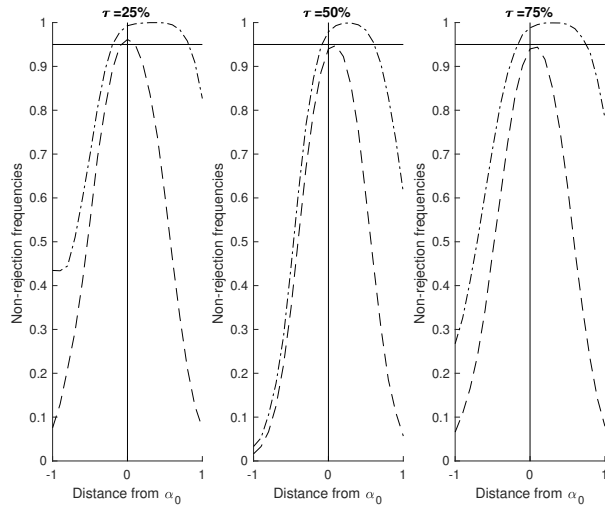

Figure 3.e:  $\pi_0 = \pi_1 = 0.1$ .

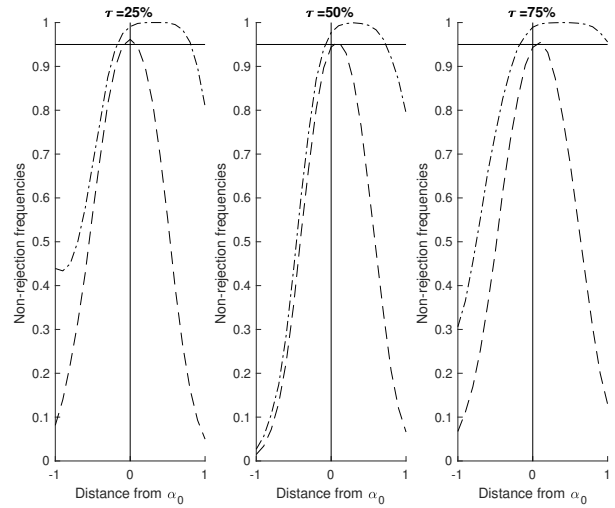

Figure 3.f:  $\pi_0 = 0$  and  $\pi_1 = 0.2$ .

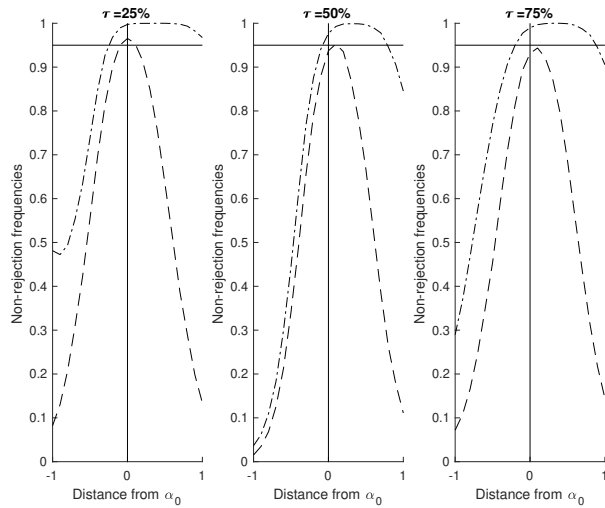

Figure 3.g:  $\pi_0 = 0.2$  and  $\pi_1 = 0.1$ .

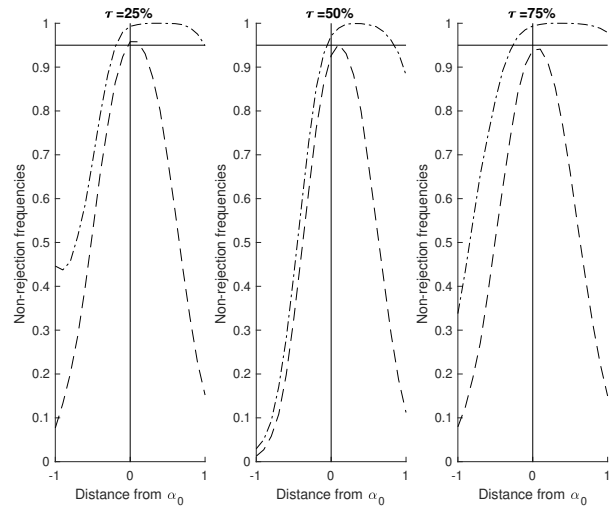

Figure 3.h:  $\pi_0 = 0.1$  and  $\pi_1 = 0.2$ .

Figure 3 (continued): Coverage frequencies. The dash-dot (— · —) curve represents the proposed inference method, and the dashed (— —) curve represents the infeasible inference method with knowing  $(p_0, p_1) = (\pi_0, \pi_1)$ .
